# Supplementary material
Source: PubMed Central journal article supplement (PMC4475867)
Supplement: AEM.00111-15_zam999116364so1.pdf [file AEM.00111-15_zam999116364so1.pdf]

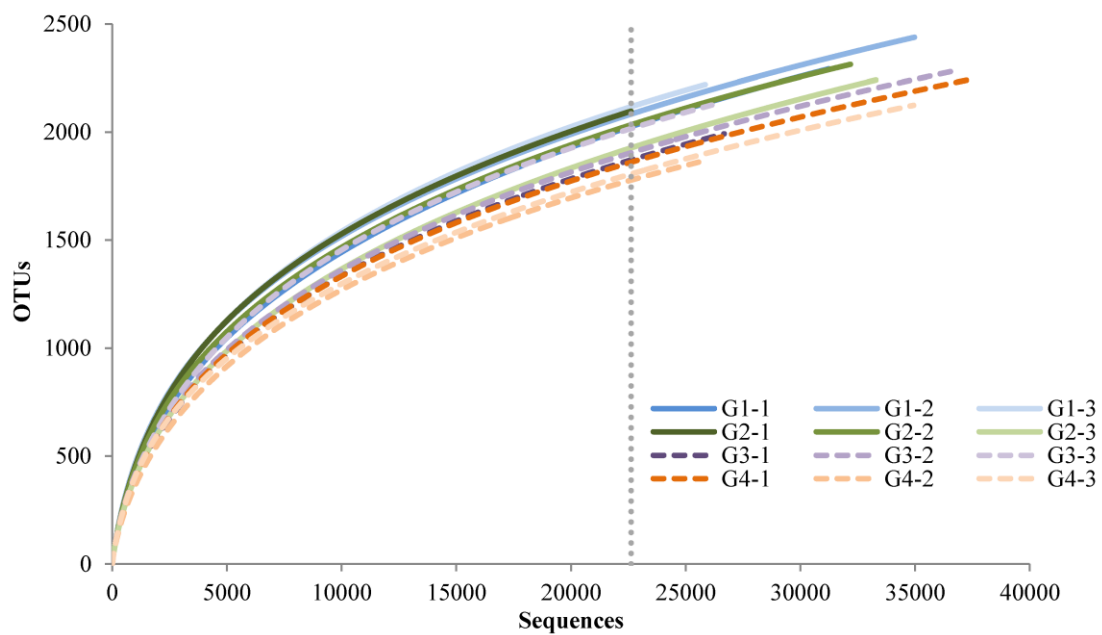

**FIG S1** Rarefaction curves of the 12 bulk soil samples using PGM 318 chip with Hi-Q Sequencing Kit. G1 and G2 showed more OTU<sub>s0.05</sub> than G3 and G4. Sequence number (x axis) plotted against OTU number (y axis). The downstream analyses were based on subsample of 22,616 sequences per sample (the vertical dashed line).

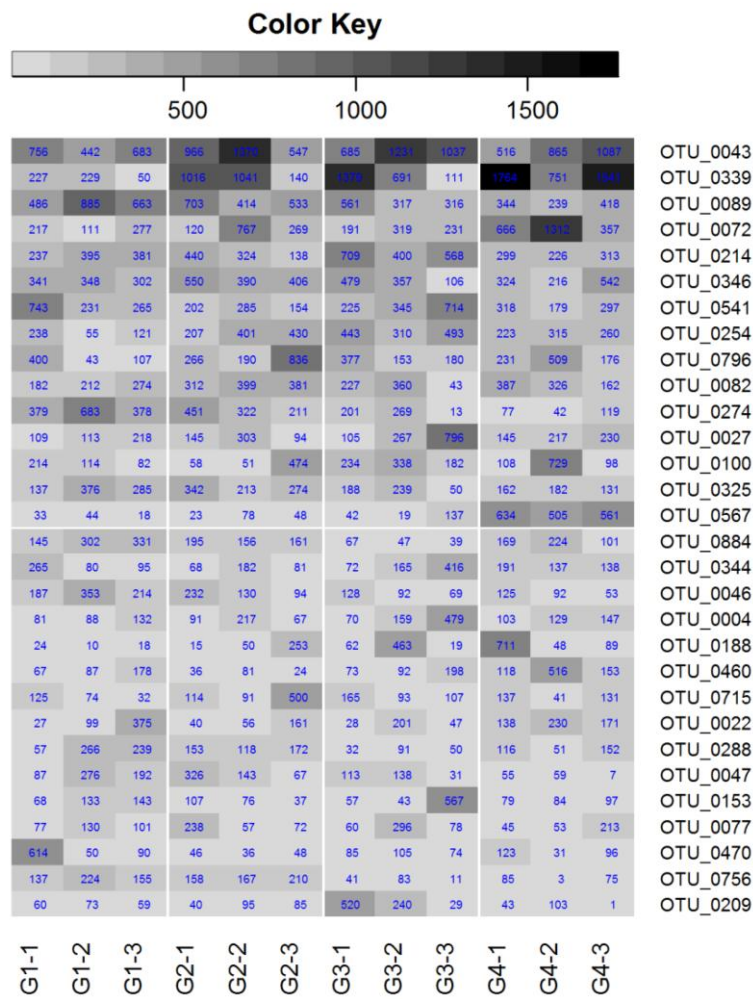

**FIG S2** Heatmap of the 30 most abundant OTU<sub>s0.05</sub> of the 12 bulk soil samples, accounting for 33% (90,033 sequences) of all sequences. Values in heatmap cells are the actual OTU<sub>0.05</sub> numbers, and separation by white lines was based on different cropping systems and the top 15<sup>th</sup> OTU<sub>0.05</sub>.

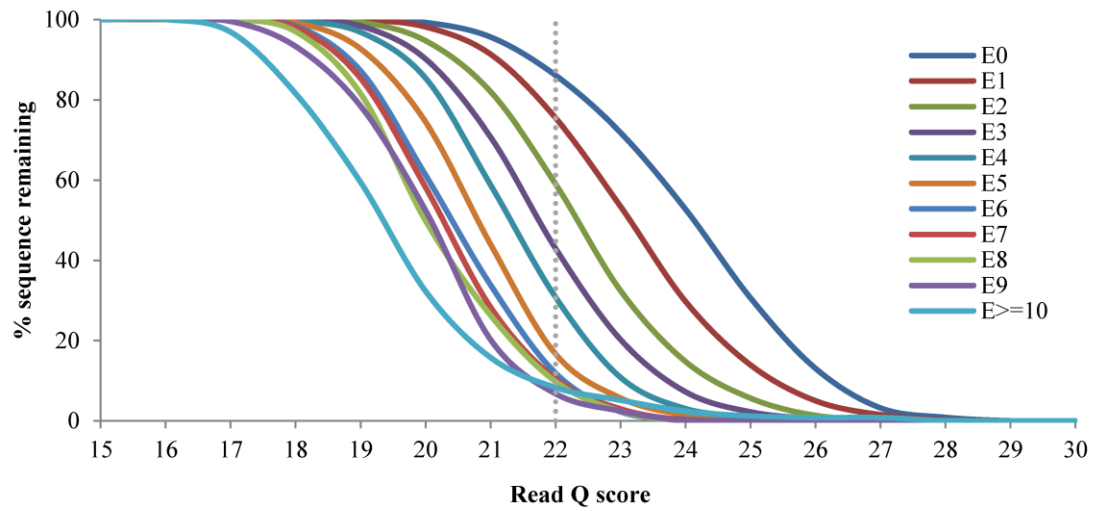

**FIG S3** Percentage of reads with specified number of errors (E0-E $\geq$ 10) by read Q score in M-R4-318, the representative of PGM chip 318 runs with Sequencing 400 Kit.

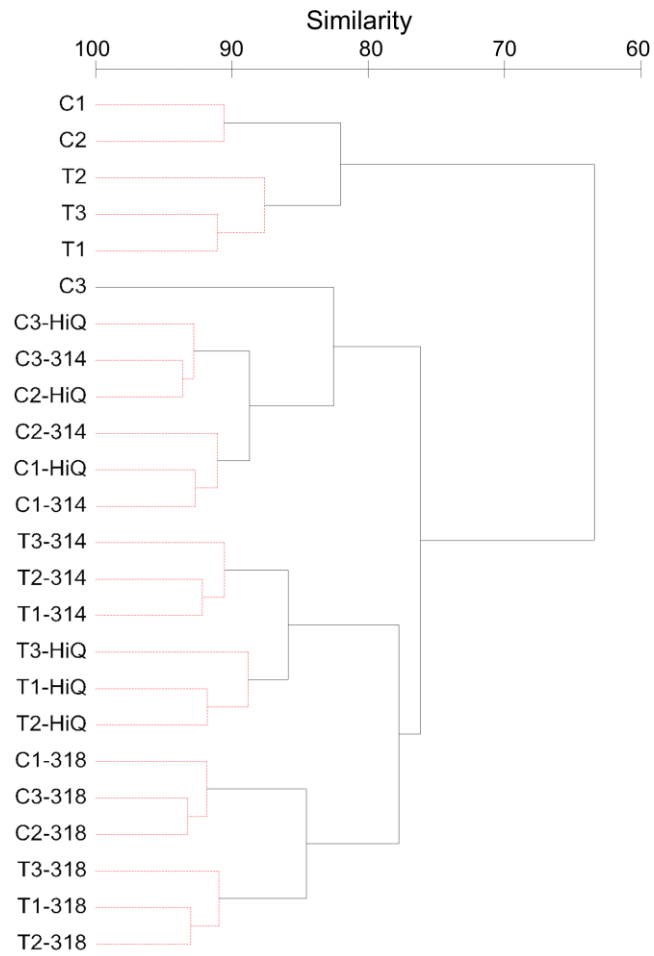

FIG S4 Complete linkage clustering of *nifH*-harboring bacterial community structure at OTU<sub>0.05</sub> level using SIMPROF (similarity profile analysis) at 95% confidence.

**TABLE S1** Cropping history of G1-G4 at Arlington, WI. G2, G3 and G4 were in the corn-soybean-canola rotation since 2008, and were changed to a continuous corn + cover crop system and a corn-soybean + cover crop system in 2012. Cover crop was planted after harvesting the corn or soybean.

| Systems | 2008    | 2009    | 2010    | 2011    | 2012              | 2013              |
|---------|---------|---------|---------|---------|-------------------|-------------------|
| G1      | Corn    | Corn    | Corn    | Corn    | Corn              | Corn              |
| G2      | Corn    | Soybean | Canola  | Corn    | Corn+covercrop    | Corn+covercrop    |
| G3      | Soybean | Canola  | Corn    | Soybean | Corn+covercrop    | Soybean+covercrop |
| G4      | Canola  | Corn    | Soybean | Canola  | Soybean+covercrop | Corn+covercrop    |

**TABLE S2** Soil properties of these 12 bulk soils from four different cropping systems; mean values of three replicates. CEC stands for Cation Exchange Capacity with unit of milli equivalents/100 g. Units for P, K, Ca, and Mg are mg/kg.

| Sample | pH  | OM (%) | P   | K   | Ca   | Mg  | CEC  |
|--------|-----|--------|-----|-----|------|-----|------|
| G1-1   | 6.4 | 2.9    | 44  | 168 | 1638 | 435 | 15   |
| G1-2   | 6.4 | 3.7    | 224 | 211 | 1909 | 428 | 17.5 |
| G1-3   | 6.6 | 3.6    | 196 | 240 | 1538 | 443 | 15   |
| G2-1   | 6.3 | 2.9    | 31  | 127 | 1612 | 446 | 15   |
| G2-2   | 6.7 | 2.8    | 69  | 126 | 1358 | 737 | 16   |
| G2-3   | 6.9 | 3.1    | 153 | 179 | 1653 | 513 | 15   |
| G3-1   | 6.7 | 3.5    | 33  | 132 | 1892 | 502 | 17   |
| G3-2   | 6.8 | 3.2    | 70  | 125 | 1303 | 592 | 15   |
| G3-3   | 7.1 | 2.8    | 177 | 142 | 1732 | 511 | 15   |
| G4-1   | 6.9 | 3.3    | 104 | 148 | 1882 | 484 | 17   |
| G4-2   | 6.9 | 2.9    | 115 | 155 | 413  | 368 | 7    |
| G4-3   | 6.7 | 3.7    | 201 | 202 | 1652 | 471 | 16   |

**TABLE S3** Diazotrophic primer sets with Ion Torrent adapters (A or trP1) and IonXpress barcodes (red). The green *nifH* primer (Poly F and R) can be replaced with other gene-specific primers for other functional gene studies.

| Forward  | A adaptor-IonXpress- <i>nifH</i> forward Primer                      |
|----------|----------------------------------------------------------------------|
| nifH-F-1 | CCATCTCATCCCTGCGTGTCTCCGACTCAGCTAAGGTAAC <b>TGCGAYCCSAARGCBGACTC</b> |
| nifH-F-2 | CCATCTCATCCCTGCGTGTCTCCGACTCAGTAAGGAGA <b>ACTGCGAYCCSAARGCBGACTC</b> |
| nifH-F-3 | CCATCTCATCCCTGCGTGTCTCCGACTCAGAAGAGGAT <b>CTGCGAYCCSAARGCBGACTC</b>  |
| nifH-F-4 | CCATCTCATCCCTGCGTGTCTCCGACTCAGTACCAAGAT <b>CTGCGAYCCSAARGCBGACTC</b> |
| nifH-F-5 | CCATCTCATCCCTGCGTGTCTCCGACTCAGCAGAAGGA <b>ACTGCGAYCCSAARGCBGACTC</b> |
| nifH-F-6 | CCATCTCATCCCTGCGTGTCTCCGACTCAGCTGCAAGT <b>CTGCGAYCCSAARGCBGACTC</b>  |

|           |                                                                |
|-----------|----------------------------------------------------------------|
| nifH-F-7  | CCATCTCATCCCTGCGTGTCTCCGACTCAGTTCGTGATTCTGCGAYCCSAARGCBGACTC   |
| nifH-F-8  | CCATCTCATCCCTGCGTGTCTCCGACTCAGTTCGGATAACTGCGAYCCSAARGCBGACTC   |
| nifH-F-9  | CCATCTCATCCCTGCGTGTCTCCGACTCAGTGAGCGGAACTGCGAYCCSAARGCBGACTC   |
| nifH-F-10 | CCATCTCATCCCTGCGTGTCTCCGACTCAGCTGACCGAACTGCGAYCCSAARGCBGACTC   |
| nifH-F-11 | CCATCTCATCCCTGCGTGTCTCCGACTCAGTCTCTGAATCTGCGAYCCSAARGCBGACTC   |
| nifH-F-12 | CCATCTCATCCCTGCGTGTCTCCGACTCAGTAGGTGGTTCGCGAYCCSAARGCBGACTC    |
| nifH-F-13 | CCATCTCATCCCTGCGTGTCTCCGACTCAGTCTAACGGACTGCGAYCCSAARGCBGACTC   |
| nifH-F-14 | CCATCTCATCCCTGCGTGTCTCCGACTCAGTTGGAGTGTCTGCGAYCCSAARGCBGACTC   |
| nifH-F-15 | CCATCTCATCCCTGCGTGTCTCCGACTCAGTCTAGAGGTCTGCGAYCCSAARGCBGACTC   |
| nifH-F-16 | CCATCTCATCCCTGCGTGTCTCCGACTCAGTCTGGATGACTGCGAYCCSAARGCBGACTC   |
| nifH-F-17 | CCATCTCATCCCTGCGTGTCTCCGACTCAGTCTATTCTGCTGCGAYCCSAARGCBGACTC   |
| nifH-F-18 | CCATCTCATCCCTGCGTGTCTCCGACTCAGAGGCAATTGCTGCGAYCCSAARGCBGACTC   |
| nifH-F-19 | CCATCTCATCCCTGCGTGTCTCCGACTCAGTTAGTCTGGACTGCGAYCCSAARGCBGACTC  |
| nifH-F-20 | CCATCTCATCCCTGCGTGTCTCCGACTCAGCAGATCCATCTGCGAYCCSAARGCBGACTC   |
| nifH-F-21 | CCATCTCATCCCTGCGTGTCTCCGACTCAGTCGCAATTACTGCGAYCCSAARGCBGACTC   |
| nifH-F-22 | CCATCTCATCCCTGCGTGTCTCCGACTCAGTTCGAGACGCTGCGAYCCSAARGCBGACTC   |
| nifH-F-23 | CCATCTCATCCCTGCGTGTCTCCGACTCAGTGCCACGAACTGCGAYCCSAARGCBGACTC   |
| nifH-F-24 | CCATCTCATCCCTGCGTGTCTCCGACTCAGAACCTCATTCTGCGAYCCSAARGCBGACTC   |
| nifH-F-25 | CCATCTCATCCCTGCGTGTCTCCGACTCAGCCTGAGATACTGCGAYCCSAARGCBGACTC   |
| nifH-F-26 | CCATCTCATCCCTGCGTGTCTCCGACTCAGTTACAACCTCTGCGAYCCSAARGCBGACTC   |
| nifH-F-27 | CCATCTCATCCCTGCGTGTCTCCGACTCAGAACCATCCGCTGCGAYCCSAARGCBGACTC   |
| nifH-F-28 | CCATCTCATCCCTGCGTGTCTCCGACTCAGATCCGGAACTGCGAYCCSAARGCBGACTC    |
| nifH-F-29 | CCATCTCATCCCTGCGTGTCTCCGACTCAGTCGACCACTCTGCGAYCCSAARGCBGACTC   |
| nifH-F-30 | CCATCTCATCCCTGCGTGTCTCCGACTCAGCGAGGTTATCTGCGAYCCSAARGCBGACTC   |
| nifH-F-31 | CCATCTCATCCCTGCGTGTCTCCGACTCAGTCCAAGCTGCTGCGAYCCSAARGCBGACTC   |
| nifH-F-32 | CCATCTCATCCCTGCGTGTCTCCGACTCAGTCTTACACACTGCGAYCCSAARGCBGACTC   |
| nifH-F-33 | CCATCTCATCCCTGCGTGTCTCCGACTCAGTTCTCATTGAACTGCGAYCCSAARGCBGACTC |
| nifH-F-34 | CCATCTCATCCCTGCGTGTCTCCGACTCAGTCGCATCGTCTGCGAYCCSAARGCBGACTC   |
| nifH-F-35 | CCATCTCATCCCTGCGTGTCTCCGACTCAGTAAGCCATTGCTGCGAYCCSAARGCBGACTC  |
| nifH-F-36 | CCATCTCATCCCTGCGTGTCTCCGACTCAGAAGGAATCGTCTGCGAYCCSAARGCBGACTC  |
| nifH-F-37 | CCATCTCATCCCTGCGTGTCTCCGACTCAGCTTGAGAATGTCTGCGAYCCSAARGCBGACTC |
| nifH-F-38 | CCATCTCATCCCTGCGTGTCTCCGACTCAGTGGAGGACGGACTGCGAYCCSAARGCBGACTC |
| nifH-F-39 | CCATCTCATCCCTGCGTGTCTCCGACTCAGTAACAATCGGCTGCGAYCCSAARGCBGACTC  |
| nifH-F-40 | CCATCTCATCCCTGCGTGTCTCCGACTCAGCTGACATAATCTGCGAYCCSAARGCBGACTC  |
| nifH-F-41 | CCATCTCATCCCTGCGTGTCTCCGACTCAGTTCCACTTCGCTGCGAYCCSAARGCBGACTC  |
| nifH-F-42 | CCATCTCATCCCTGCGTGTCTCCGACTCAGAGCACGAATCTGCGAYCCSAARGCBGACTC   |
| nifH-F-43 | CCATCTCATCCCTGCGTGTCTCCGACTCAGCTTGACACCGCTGCGAYCCSAARGCBGACTC  |
| nifH-F-44 | CCATCTCATCCCTGCGTGTCTCCGACTCAGTTGGAGGCCAGCTGCGAYCCSAARGCBGACTC |
| nifH-F-45 | CCATCTCATCCCTGCGTGTCTCCGACTCAGTGGAGCTTCCTCTGCGAYCCSAARGCBGACTC |
| nifH-F-46 | CCATCTCATCCCTGCGTGTCTCCGACTCAGTCACTCCGAACCTGCGAYCCSAARGCBGACTC |
| nifH-F-47 | CCATCTCATCCCTGCGTGTCTCCGACTCAGTAAGGCAACCACTGCGAYCCSAARGCBGACTC |
| nifH-F-48 | CCATCTCATCCCTGCGTGTCTCCGACTCAGTTCTAAGAGACTGCGAYCCSAARGCBGACTC  |
| nifH-F-49 | CCATCTCATCCCTGCGTGTCTCCGACTCAGTCTTAACATAACTGCGAYCCSAARGCBGACTC |

|           |                                                                 |
|-----------|-----------------------------------------------------------------|
| nifH-F-50 | CCATCTCATCCCTGCGTGTCTCCGACTCAGCGGACAATGGCTGCGAYCCSAARGCBGACTC   |
| nifH-F-51 | CCATCTCATCCCTGCGTGTCTCCGACTCAGTTGAGCCTATTCTGCGAYCCSAARGCBGACTC  |
| nifH-F-52 | CCATCTCATCCCTGCGTGTCTCCGACTCAGCCGCATGGAACGCGAYCCSAARGCBGACTC    |
| nifH-F-53 | CCATCTCATCCCTGCGTGTCTCCGACTCAGCTGGCAATCCTCTGCGAYCCSAARGCBGACTC  |
| nifH-F-54 | CCATCTCATCCCTGCGTGTCTCCGACTCAGCCGGAGAATCGCTGCGAYCCSAARGCBGACTC  |
| nifH-F-55 | CCATCTCATCCCTGCGTGTCTCCGACTCAGTCCACCTCCTCTGCGAYCCSAARGCBGACTC   |
| nifH-F-56 | CCATCTCATCCCTGCGTGTCTCCGACTCAGCAGCATTAATTCTGCGAYCCSAARGCBGACTC  |
| nifH-F-57 | CCATCTCATCCCTGCGTGTCTCCGACTCAGTCTGGCAACGGCTGCGAYCCSAARGCBGACTC  |
| nifH-F-58 | CCATCTCATCCCTGCGTGTCTCCGACTCAGTCTAGAACACTGCGAYCCSAARGCBGACTC    |
| nifH-F-59 | CCATCTCATCCCTGCGTGTCTCCGACTCAGTCTTGATGTTCTGCGAYCCSAARGCBGACTC   |
| nifH-F-60 | CCATCTCATCCCTGCGTGTCTCCGACTCAGTCTAGCTCTTCTGCGAYCCSAARGCBGACTC   |
| nifH-F-61 | CCATCTCATCCCTGCGTGTCTCCGACTCAGTCACTCGGATCTGCGAYCCSAARGCBGACTC   |
| nifH-F-62 | CCATCTCATCCCTGCGTGTCTCCGACTCAGTTCTTGCTTCACTGCGAYCCSAARGCBGACTC  |
| nifH-F-63 | CCATCTCATCCCTGCGTGTCTCCGACTCAGCCTTAGAGTTCGCGAYCCSAARGCBGACTC    |
| nifH-F-64 | CCATCTCATCCCTGCGTGTCTCCGACTCAGCTGAGTTCCGACTGCGAYCCSAARGCBGACTC  |
| nifH-F-65 | CCATCTCATCCCTGCGTGTCTCCGACTCAGTCTTGCCACATCTGCGAYCCSAARGCBGACTC  |
| nifH-F-66 | CCATCTCATCCCTGCGTGTCTCCGACTCAGCCGCAATCATCTGCGAYCCSAARGCBGACTC   |
| nifH-F-67 | CCATCTCATCCCTGCGTGTCTCCGACTCAGTTCTACCAGTCTGCGAYCCSAARGCBGACTC   |
| nifH-F-68 | CCATCTCATCCCTGCGTGTCTCCGACTCAGTCAAGAAGTTCGCGAYCCSAARGCBGACTC    |
| nifH-F-69 | CCATCTCATCCCTGCGTGTCTCCGACTCAGTTCAATTGGCTGCGAYCCSAARGCBGACTC    |
| nifH-F-70 | CCATCTCATCCCTGCGTGTCTCCGACTCAGCCTACTGGTCTGCGAYCCSAARGCBGACTC    |
| nifH-F-71 | CCATCTCATCCCTGCGTGTCTCCGACTCAGTGAGGCTCCGACTGCGAYCCSAARGCBGACTC  |
| nifH-F-72 | CCATCTCATCCCTGCGTGTCTCCGACTCAGCGAAGGCCACACTGCGAYCCSAARGCBGACTC  |
| nifH-F-73 | CCATCTCATCCCTGCGTGTCTCCGACTCAGTCTGCTGTCTGCGAYCCSAARGCBGACTC     |
| nifH-F-74 | CCATCTCATCCCTGCGTGTCTCCGACTCAGCGATCGGTTCTGCGAYCCSAARGCBGACTC    |
| nifH-F-75 | CCATCTCATCCCTGCGTGTCTCCGACTCAGTCAGGAATACTGCGAYCCSAARGCBGACTC    |
| nifH-F-76 | CCATCTCATCCCTGCGTGTCTCCGACTCAGCGGAAGAACCCTCTGCGAYCCSAARGCBGACTC |
| nifH-F-77 | CCATCTCATCCCTGCGTGTCTCCGACTCAGCGAAGCGATTCTGCGAYCCSAARGCBGACTC   |
| nifH-F-78 | CCATCTCATCCCTGCGTGTCTCCGACTCAGCAGCCAATTCTCTGCGAYCCSAARGCBGACTC  |
| nifH-F-79 | CCATCTCATCCCTGCGTGTCTCCGACTCAGCCTGGTTGTCGCGAYCCSAARGCBGACTC     |
| nifH-F-80 | CCATCTCATCCCTGCGTGTCTCCGACTCAGTCGAAGGCAGGCTGCGAYCCSAARGCBGACTC  |
| nifH-F-81 | CCATCTCATCCCTGCGTGTCTCCGACTCAGCCTGCCATTCTGCGAYCCSAARGCBGACTC    |
| nifH-F-82 | CCATCTCATCCCTGCGTGTCTCCGACTCAGTTGGCATCTCTGCGAYCCSAARGCBGACTC    |
| nifH-F-83 | CCATCTCATCCCTGCGTGTCTCCGACTCAGCTAGGACATTCTGCGAYCCSAARGCBGACTC   |
| nifH-F-84 | CCATCTCATCCCTGCGTGTCTCCGACTCAGCTTCCATAACTGCGAYCCSAARGCBGACTC    |
| nifH-F-85 | CCATCTCATCCCTGCGTGTCTCCGACTCAGCCAGCCTCAACTGCGAYCCSAARGCBGACTC   |
| nifH-F-86 | CCATCTCATCCCTGCGTGTCTCCGACTCAGCTTGGTTATTCTGCGAYCCSAARGCBGACTC   |
| nifH-F-87 | CCATCTCATCCCTGCGTGTCTCCGACTCAGTTGGCTGGACTGCGAYCCSAARGCBGACTC    |
| nifH-F-88 | CCATCTCATCCCTGCGTGTCTCCGACTCAGCCGAACACTTCTGCGAYCCSAARGCBGACTC   |
| nifH-F-89 | CCATCTCATCCCTGCGTGTCTCCGACTCAGTCTGAATCTCTGCGAYCCSAARGCBGACTC    |
| nifH-F-90 | CCATCTCATCCCTGCGTGTCTCCGACTCAGCTAACCCACGGCTGCGAYCCSAARGCBGACTC  |
| nifH-F-91 | CCATCTCATCCCTGCGTGTCTCCGACTCAGCGGAAGGATGCTGCGAYCCSAARGCBGACTC   |
| nifH-F-92 | CCATCTCATCCCTGCGTGTCTCCGACTCAGCTAGGAACCGCTGCGAYCCSAARGCBGACTC   |

|           |                                                                            |
|-----------|----------------------------------------------------------------------------|
| nifH-F-93 | CCATCTCATCCCTGCGTGTCTCCGACTCAGCTTGTC <del>CAATC</del> TGCGAYCCSAARGCBGACTC |
| nifH-F-94 | CCATCTCATCCCTGCGTGTCTCCGACTCAGTCCGACAAGCTGCGAYCCSAARGCBGACTC               |
| nifH-F-95 | CCATCTCATCCCTGCGTGTCTCCGACTCAGCGGACAGATCTGCGAYCCSAARGCBGACTC               |
| nifH-F-96 | CCATCTCATCCCTGCGTGTCTCCGACTCAGTTAAGCGGCTGCGAYCCSAARGCBGACTC                |
|           |                                                                            |
| Reverse   | trP1- <i>nifH</i> reverse primer                                           |
| nifH-R    | CCTCTCTATGGGCAGTCGGTGATATSGCCATCATYTCRCCGGA                                |
